# Supplementary material for: Sunlight active U3O8@ZnO nanocomposite superfast photocatalyst: synthesis, characterization and application
Source: Royal Society of Chemistry journal article supplement (doi:10.1039/c8na00051d), 2018-10-08
Supplement: c8na00051d1.pdf [file c8na00051d1.pdf]

## Supplementary Data

### 1. HPLC study results

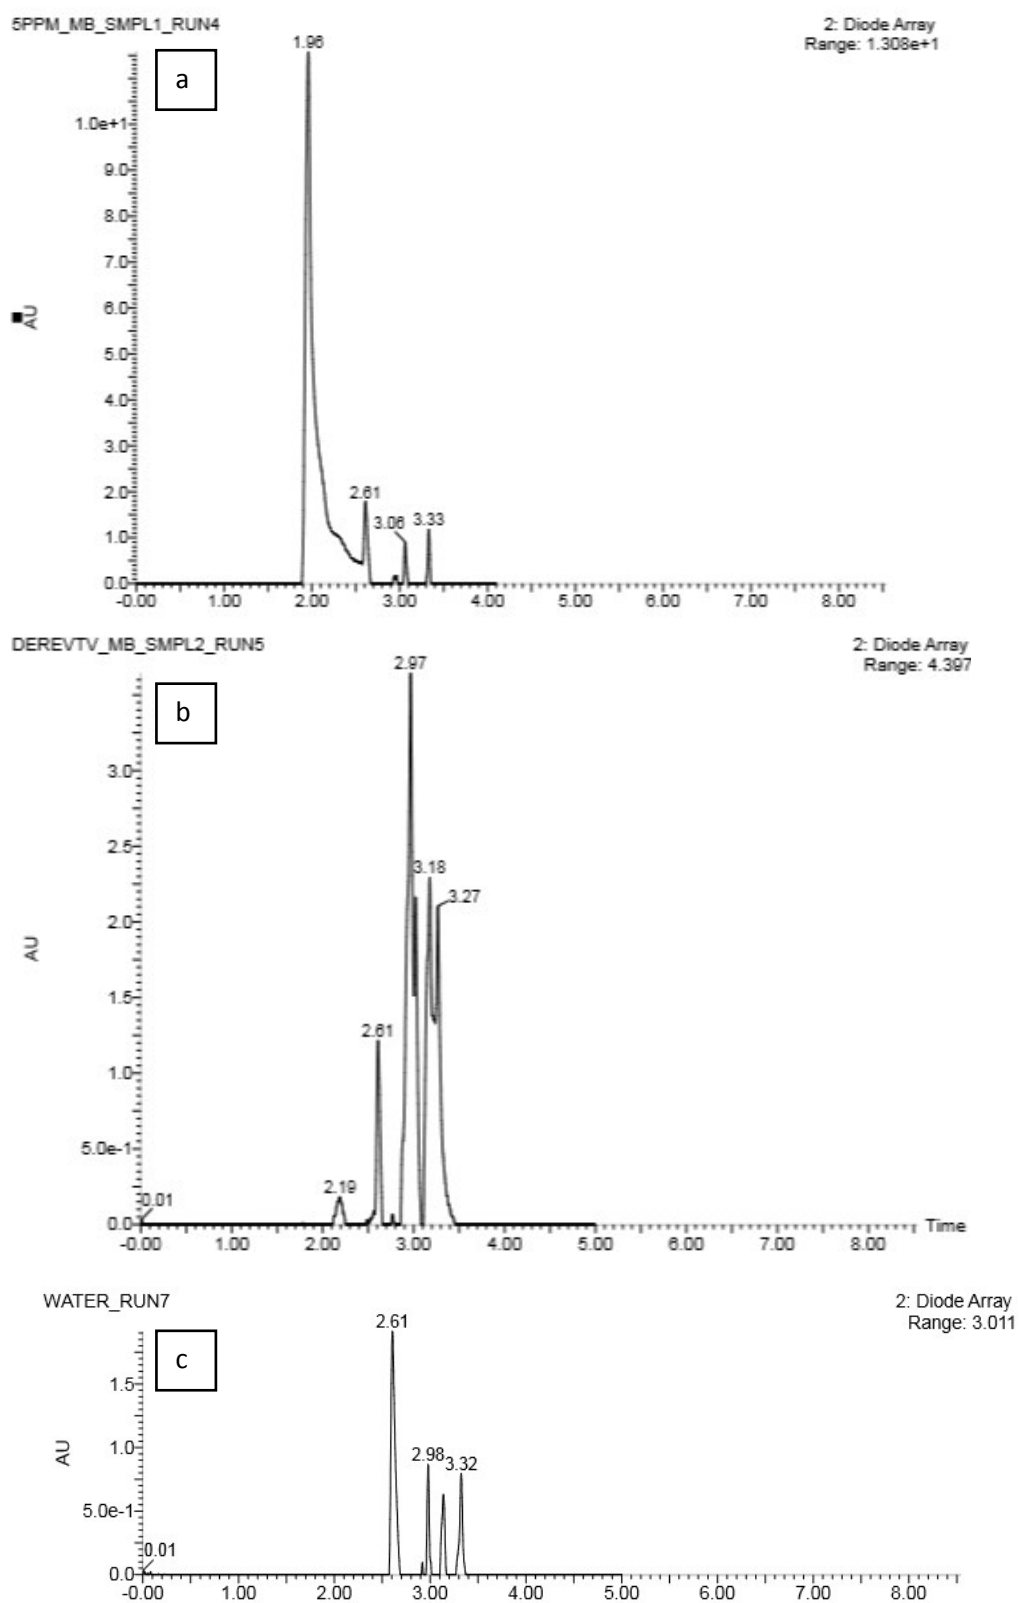

Fig. S1. HPLC plots of methylene blue (a) before degradation (b) after degradation and (c) water

## 2. XRD pattern of the photocatalyst after degradation of methylene blue

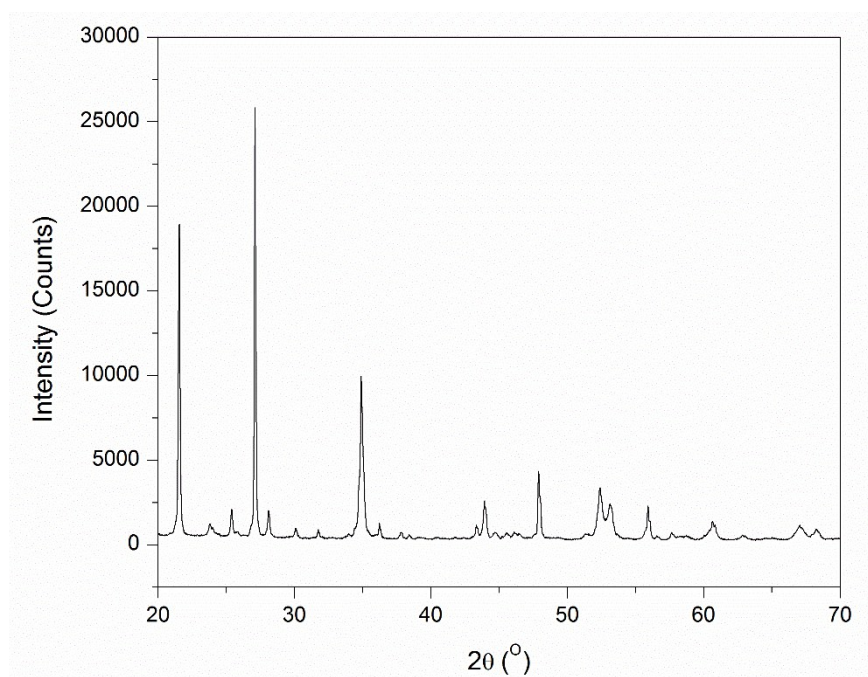

Fig. S2. XRD pattern of the  $U_3O_8@ZnO$  photocatalyst after degradation of methylene blue

## 3. UV-vis study to confirm photocatalytic activity of the composite against adsorption

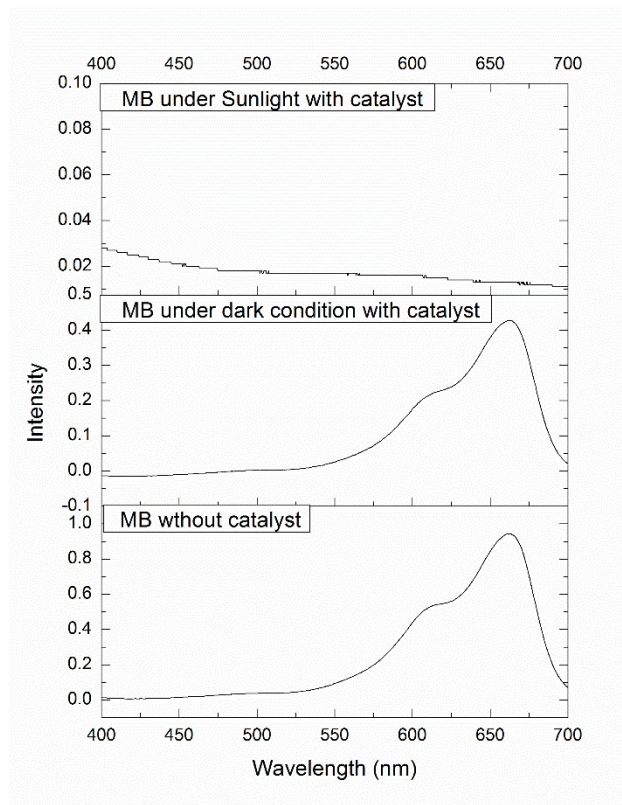

Fig. S3. UV-vis spectra of methylene blue solutions to demonstrate photocatalysis
